# Supplementary material
Source: MDPI journal article supplement (https://www.mdpi.com/1999-4907/10/7/562)
Supplement: s1 [file s1]

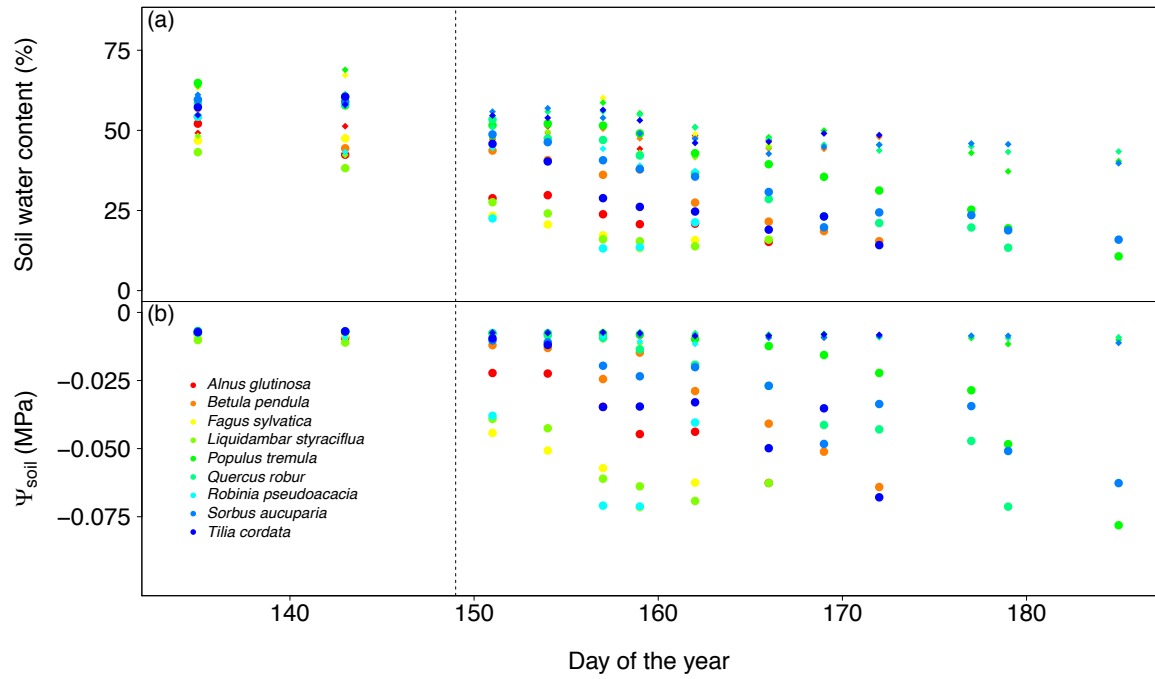

**Figure S1.** (a) mean soil water content (%) and (b) mean soil water potential ( $\Psi_{\text{soil}}$ ; MPa) per species as a function of day of the year. Diamonds indicate means of well-watered trees; circles indicate means of drought-treated trees. Vertical dashed line indicates the start of the drought treatment.

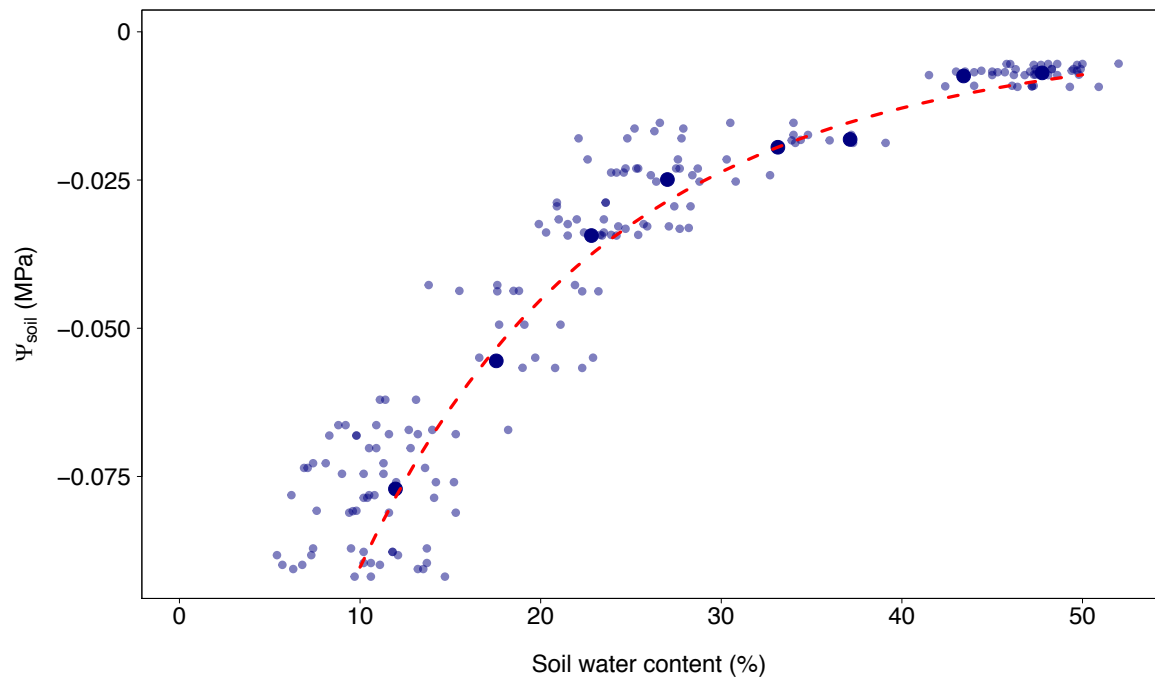

**Figure S2.** Soil water potential ( $\Psi_{\text{soil}}$ ; MPa) as a function of soil water content (%) with a modified hyperbola fit ( $R^2 = 1.00$ ) indicated in red. Shaded circles represent all data from three different tensiometers; full circles are averaged data without pseudoreplications.
